# Supplementary material for: Clinical Whole-Genome Sequencing Assay for Rapid Mycobacterium tuberculosis Complex First-Line Drug Susceptibility Testing and Phylogenetic Relatedness Analysis
Source: MDPI journal article supplement (doi:10.3390/microorganisms11102538), 2023-10-11
Supplement: s1 [file s1]

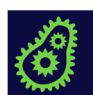

## Article

# Clinical Whole-Genome Sequencing Assay for Rapid *Mycobacterium tuberculosis* Complex First-Line Drug Susceptibility Testing and Phylogenetic Relatedness Analysis

Bennett Shaw <sup>1</sup>, Benjamin von Bredow <sup>1,2</sup>, Allison Tsan <sup>1</sup>, Omai Garner <sup>1</sup> and Shangxin Yang <sup>1,\*</sup>

<sup>1</sup> Department of Pathology and Laboratory Medicine, UCLA David Geffen School of Medicine, Los Angeles, CA 90095, USA; bmshaw@mednet.ucla.edu (B.S.); benjamin.vonbredow@corewellhealth.org (B.v.B.); attsan@mednet.ucla.edu (A.T.); ogarner@mednet.ucla.edu (O.G.)

<sup>2</sup> Department of Pathology, Oakland University William Beaumont School of Medicine, Rochester, MI 48309, USA

\* Correspondence: shangxinyang@mednet.ucla.edu

**Table S1.** Mutation Summary Table.

| Sample ID | RIF              | INH                                | PZA                 | EMB              | STM              |
|-----------|------------------|------------------------------------|---------------------|------------------|------------------|
| UCLA_485  |                  |                                    | pncA p.His57Asp     |                  |                  |
| UCLA_487  |                  |                                    | pncA p.His57Asp     |                  |                  |
| UCLA_574  |                  |                                    | pncA p.His57Asp     |                  |                  |
| UCLA_683  |                  | fabG1 c.-15C>T                     |                     |                  | gid p.Leu79Ser   |
| UCLA_737  |                  | katG p.Ser315Thr                   |                     |                  |                  |
| UCLA_789  |                  | katG p.Ser315Thr                   |                     |                  | rpsL p.Lys43Arg  |
| UCLA_798  |                  | fabG1 c.-15C>T                     | pncA c.164_165insGG |                  | rpsL p.Lys88Arg  |
| UCLA_845  |                  | fabG1 c.-15C>T                     |                     |                  |                  |
| UCLA_866  |                  | S (ahpC p.Asp73His)                |                     |                  | gid c.115_115del |
| UCLA_869  |                  | katG p.Ser315Thr                   |                     |                  | rpsL p.Lys88Arg  |
| UCLA_870  |                  |                                    | pncA p.His57Asp     |                  |                  |
| UCLA_1021 | rpoB p.Gln432Pro | fabG1 c.-15C>T<br>katG p.Ser315Thr | pncA p.His82Arg     | embB p.Met306Ile |                  |
| UCLA_1222 |                  |                                    | pncA p.His57Asp     |                  |                  |

**Table S2.** Growth Media Comparison.

| Pair | Sample   | Culture Media | MTB AMR WGS Result |
|------|----------|---------------|--------------------|
| 1    | UCLA 658 | Solid         | sensitive          |
|      | UCLA 659 | MGIT          | sensitive          |
| 2    | UCLA 737 | Solid         | R: isoniazid       |
|      | UCLA 738 | MGIT          | R: isoniazid       |
| 3    | UCLA 863 | Solid         | sensitive          |
|      | UCLA 864 | MGIT          | sensitive          |
